# Supplementary material for: Genomic and transcriptomic analyses of thyroid cancers identify DICER1 somatic mutations in adult follicular-patterned RAS-like tumors
Source: PubMed Central journal article supplement (PMC10585144; doi:10.3389/fendo.2023.1267499), 2023-10-05
Supplement: DataSheet_1.pdf [file DataSheet_1.pdf]

## *Supplementary Material*

### **Genomic and transcriptomic analyses of thyroid cancers identify DICER1 somatic mutations in adult follicular-patterned RAS-like tumors**

Minna Emanuela<sup>1\*</sup>, Devecchi Andrea<sup>1</sup>, Pistore Federico<sup>2</sup>, Paolini Biagio<sup>3</sup>, Mauro Giuseppe<sup>2,4</sup>, Penso Donata Alda<sup>1</sup>, Pagliardini Sonia<sup>2</sup>, Busico Adele<sup>1</sup>, Pruneri Giancarlo<sup>5</sup>, De Cecco Loris<sup>2</sup>, Borrello Maria Grazia<sup>2</sup>, Sensi Maria Luisa<sup>6§</sup>, Greco Angela<sup>2§\*</sup>

**\* Correspondence:**

Greco Angela

[Angela.Greco@istitutotumori.mi.it](mailto:Angela.Greco@istitutotumori.mi.it)

Minna Emanuela

[Emanuela.Minna@istitutotumori.mi.it](mailto:Emanuela.Minna@istitutotumori.mi.it)

- 1** Supplementary Figure 1.
- 2** Supplementary Figure 2.
- 3** Supplementary Figure 3.
- 4** Supplementary Table 1.
- 5** Supplementary Table 2. Uploaded as separate excel format table
- 6** Supplementary Table 3.

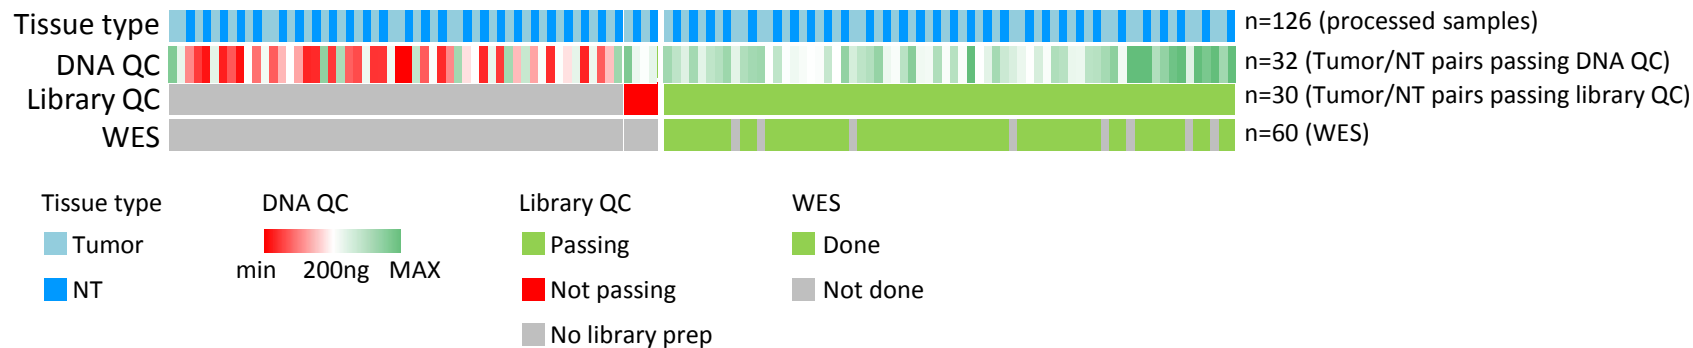

**Supplementary Figure 1.** Summary of sample processing and selection for whole exome sequencing.

Color code heatmap showing sample processing and quality control; each column represents a tissue sample. A total of 126 tissue sample derived from 57 patients, and including thyroid tumor and patient matched non-neoplastic thyroid, underwent DNA extraction. For 12 patients 2 different tumor specimens were available and processed. Only tumor/NT pairs with both specimens passing DNA quality control (total extracted DNA>200ng) underwent DNA library preparation. Only libraries passing quality control were then submitted to DNA sequencing. For patients with double tumor specimens only the best quality library was sequenced. Abbreviations: WES, whole exome sequencing; NT, non-neoplastic thyroid; QC, quality control

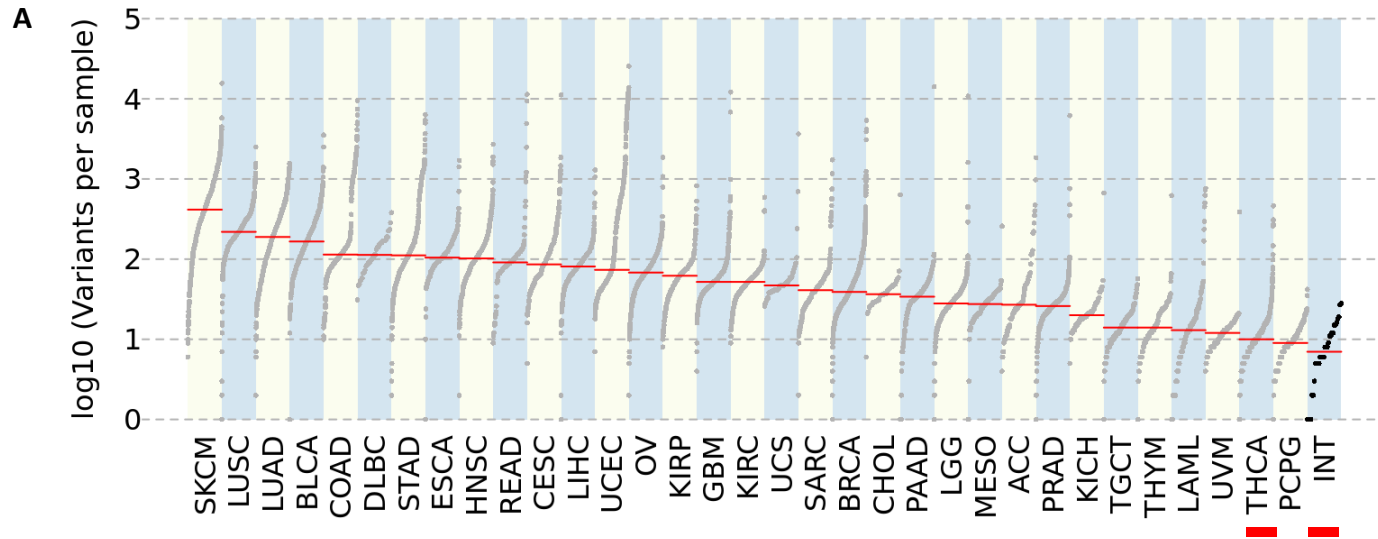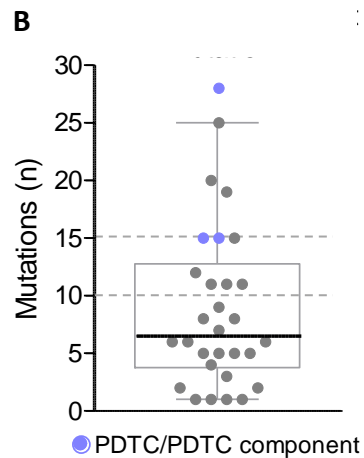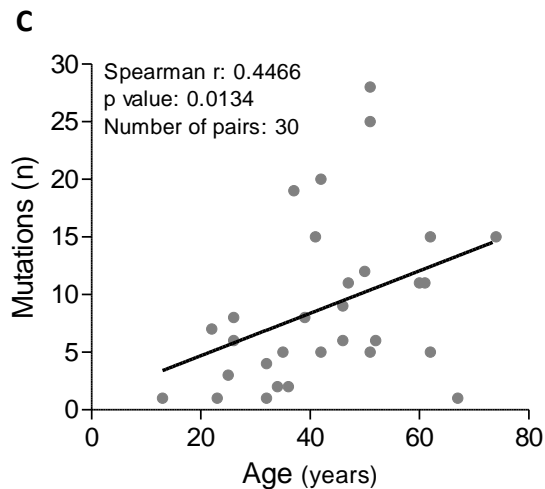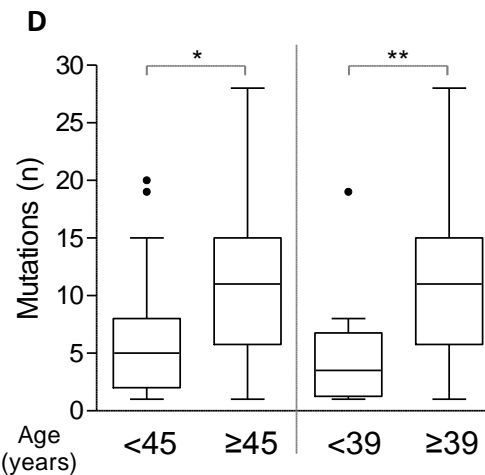

**Supplementary Figure 2.** Mutation load in the 30 thyroid cancer (TC) patients collected at our Institute.

**A.** Mutational load distribution in the TC series collected at Fondazione IRCCS Istituto Nazionale dei Tumori (INT) compared to 33 TCGA landmark cohorts. Only non-synonymous mutations (comprising missense, nonsense, and splice-site mutations with amino acid changing) were considered. Each dot corresponds to a tumor sample, with vertical position representing the number of somatic mutations ( $\log_{10}$  scale). Cohorts are ordered based on decreasing median of somatic mutation number. Our (INT) and TCGA thyroid cancer (THCA) cohorts displaying similar and low mutational load are highlighted by red solid lines; other tumor type acronyms are described on <http://cancergenome.nih.gov/>. **B.** Boxplot with scatter plot showing mutational load data (linear scale) in our TC series. **C.** Correlation of mutational load data with patient age in our TC series. **D.** Mutational load data in our TC series stratified for age classes; the 45 year threshold (used in staging systems) and the 39 year threshold (used in young adults definition) were considered. \*  $p$ value<0.05; \*\*  $p$ value<0.005 by non parametric Mann Whitney test.

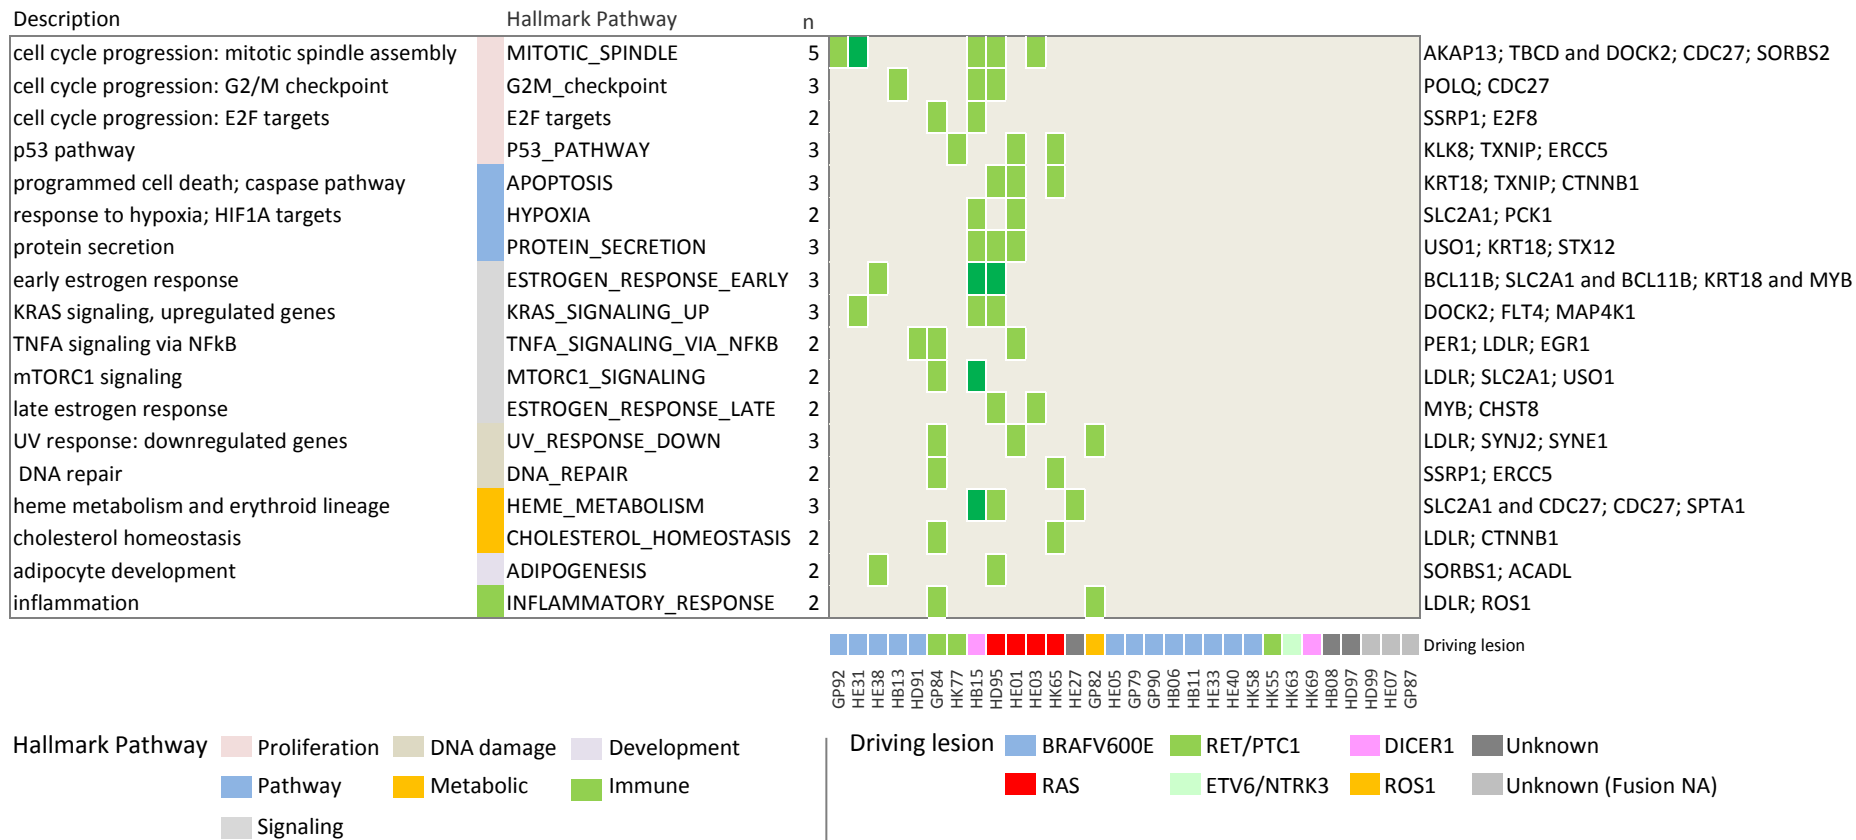

### Supplementary Figure 3. Pathway level analysis for somatic mutations identified in our cohort.

Somatic mutations identified in our 30 thyroid cancer patients were investigated at the pathway level to identify the affected biological processes. The Hallmark collection comprising 50 gene sets derived from Molecular Signature Database was tested. A pathway was called mutated if at least two of its member genes were mutated. The identified pathways, the number of mutated samples (n) and the list of mutated genes are showed. Each column represents a patient and the presence of a mutated gene in a given pathway is indicated by the green tag; dark green indicates the concurrence of two mutated genes in the same pathway. Patient ID is shown on the bottom along with driving lesion information. Hallmark pathway color labels indicate biological super categories according to the “Hallmarks” collection original publication.

**Supplementary Table 1.** Caselist clinicopathological features

| Patient ID | Tumor type | Histological subtype                     | Size (cm) | ETE | LNM<br>(positive/tested) | Age | Gender | Driver summary              |
|------------|------------|------------------------------------------|-----------|-----|--------------------------|-----|--------|-----------------------------|
| HE05       | PTC        | Tall cell                                | 1.7       | Yes | Yes (4/5)                | 46  | F      | BRAF_V600E                  |
| HE31       | PTC        | Tall cell                                | 2         | Yes | No                       | 50  | F      | BRAF_V600E                  |
| HE38       | PTC        | Tall cell                                | 1.2       | Yes | No                       | 42  | F      | BRAF_V600E                  |
| GP90       | PTC        | Tall cell                                | 2.2       | Yes | Yes (3/4)                | 61  | F      | BRAF_V600E                  |
| GP92       | PTC        | Tall cell                                | 1.5       | Yes | Yes (6/NA)               | 32  | F      | BRAF_V600E                  |
| HB11       | PTC        | Tall cell                                | 5         | Yes | No                       | 51  | F      | BRAF_V600E                  |
| HE40       | PTC        | Tall cell                                | 2.1       | Yes | No                       | 62  | F      | BRAF_V600E                  |
| GP79       | PTC        | Tall cell - trabecular                   | 2.5       | Yes | Yes (7/45)               | 35  | F      | BRAF_V600E                  |
| HE33       | PTC        | Classical                                | 3.7       | Yes | Yes (18/NA)              | 26  | M      | BRAF_V600E                  |
| HK58       | PTC        | Classical                                | 1.4       | NA  | Yes (2/29)               | 52  | M      | BRAF_V600E                  |
| HB13       | PTC        | Follicular - classical                   | 1.5       | No  | No                       | 62  | F      | BRAF_V600E                  |
| HD91       | PTC        | Follicular                               | 3.4       | No  | Yes (1/6)                | 42  | F      | BRAF_V600E                  |
| HB06       | PTC        | Follicular                               | 1.3       | No  | No                       | 36  | F      | BRAF_V600E                  |
| HE03       | PTC        | Follicular                               | 1.8       | No  | No                       | 22  | F      | NRAS_Q61R                   |
| HE01       | PTC        | Follicular                               | 1.8       | Yes | No                       | 46  | F      | NRAS_Q61R                   |
| HD95       | PTC        | Follicular                               | 4.5       | No  | No                       | 37  | F      | NRAS_Q61R                   |
| HK65       | PDTC+PTC   | NA                                       | 2.5       | Yes | No                       | 74  | F      | KRAS_G12V; CTNNB1_Q177*     |
| GP82       | PTC        | Solid - trabecular                       | 2.8       | Yes | No                       | 60  | F      | ROS1_P2130A                 |
| HK69       | PTC        | Follicular                               | 1.5       | No  | No                       | 39  | F      | DICER1_D1810V; DICER1_R459* |
| HB15       | PDTC       | Solid - Insular                          | 1.8       | NA  | No                       | 51  | F      | DICER1_D1709N               |
| HK55       | PTC        | Classical                                | 2         | No  | Yes (25/73)              | 25  | M      | RET/PTC1                    |
| GP84       | PTC        | Classical                                | 2         | Yes | Yes (4/7)                | 47  | F      | RET/PTC1                    |
| HK77       | PTC        | Classical                                | 1.7       | Yes | No                       | 13  | M      | RET/PTC1                    |
| HK63       | PTC        | Follicular with focal oncocytic features | 1.8       | No  | No                       | 34  | F      | ETV6/NTRK3                  |
| HB08       | PTC        | Classical                                | 1.5       | Yes | Yes (3/NA)               | 32  | F      | Unknown                     |
| HD97       | PTC        | Follicular                               | 5         | Yes | No                       | 51  | F      | Unknown                     |
| HE27       | PDTC+PTC   | Insular - trabecular with focal PTC      | 6.5       | No  | No                       | 41  | M      | Unknown                     |
| HD99       | PTC        | Follicular                               | 5         | No  | No                       | 26  | M      | Unknown (fusion NA)         |
| HE07       | PTC        | Follicular                               | 4.5       | No  | No                       | 67  | F      | Unknown (fusion NA)         |
| GP87       | PTC        | Solid - trabecular                       | 5         | Yes | Yes (17/NA)              | 23  | F      | Unknown (fusion NA)         |

Abbreviations: ETE, extra thyroid extension; LNM, lymph node metastases; PTC papillary thyroid carcinoma; PDTC poorly differentiated thyroid carcinoma; NA, not available

**Supplementary Table 3.** COSMIC derived thyroid studies reporting ROS1 mutation

| Study ID          | Mutations (n) | Patients (n) | Total reported samples (n) | Reference PMID | COSMIC ID                                                                                                                                        | ROS1 CDS Mutation                                                                                                                                                    | ROS1 AA mutation                                                                                                                                 | ROS1 VAF                                                                   | TC histotype                                                               | Other mutated genes                                                        |
|-------------------|---------------|--------------|----------------------------|----------------|--------------------------------------------------------------------------------------------------------------------------------------------------|----------------------------------------------------------------------------------------------------------------------------------------------------------------------|--------------------------------------------------------------------------------------------------------------------------------------------------|----------------------------------------------------------------------------|----------------------------------------------------------------------------|----------------------------------------------------------------------------|
| Pozdeyev_CCR2018  | 2             | 2            | 630                        | 29615459       | 2762841<br>2762794                                                                                                                               | c.578T>C<br>c.634G>A                                                                                                                                                 | p.V193A<br>p.E212K                                                                                                                               | NA<br>NA                                                                   | FTC<br>PTC                                                                 | HRAS_Q61R; BCORL1; RANBP2<br>BRAF_V600E; ATM; MEN1;<br>TERT promoter       |
| Swierniak_MCE2016 | 1             | 1            | 48                         | 27283500       | 2800085                                                                                                                                          | c.4322-10C>A                                                                                                                                                         | p. not specified                                                                                                                                 | 0.38                                                                       | FTA                                                                        | NSD1                                                                       |
| Landa_JCI2016     | 1             | 1            | 117                        | 26878173       | 2666535                                                                                                                                          | c.3626T>A                                                                                                                                                            | p.L1209*                                                                                                                                         | 0.25                                                                       | ATC                                                                        | NF1; PIK3CD; PTEN; TP53 + 23<br>other genes with SNVs                      |
| TCGA_Cell2014*    | 3             | 3            | 402                        | 25417114       | 2121945<br>2121996<br>2121935                                                                                                                    | c.3403G>T<br>c.3059C>A<br>c.3239C>A                                                                                                                                  | p.G1135W<br>p.P1020H<br>p.T1080K                                                                                                                 | 0.12<br>0.34<br>0.32                                                       | PTC<br>PTC<br>PTC                                                          | BRAF_V600E<br>BRAF_V600E<br>BRAF_V600E; ZFH3_H1571R                        |
| CGP Study_589     | 5             | 4            | 5                          | NA             | 2746518<br>2549946<br>2186173**<br>2186085                                                                                                       | c.3791G>C<br>c.3791G>C<br>c.2376G>T;<br>c.2983A>T<br>c.6619A>T                                                                                                       | p.R1264T<br>p.R1264T<br>p.M792I;<br>p.S995C<br>p.T2207S                                                                                          | NA<br>NA<br>NA<br>NA<br>NA                                                 | NA<br>NA<br>NA<br>NA<br>NA                                                 | NA<br>NA<br>NA<br>NA<br>NA                                                 |
| CGP Study_676*    | 13            | 10           | 13                         | NA             | 2745043<br>2745048**<br><br>2745038<br>2745060<br>2745058<br>2745049<br>2745056<br>2745055<br>2745053**<br><br>c.2186G>T<br>c.2198G>T<br>2745059 | c.2223C>A<br>c.2809C>T<br>c.6347G>A<br>c.5525G>T<br>c.4561C>T<br>c.3833T>C<br>c.3713T>A<br>c.2762C>A<br>c.2269G>A<br>c.2159G>T<br>c.2186G>T<br>c.2198G>T<br>c.536A>G | p.H741Q<br>p.P937S<br>p.R2116K<br>p.S1842I<br>p.Q1521*<br>p.F1278S<br>p.L1238H<br>p.A921D<br>p.G757S<br>p.S720I<br>p.W729L<br>p.G733V<br>p.Y179C | NA<br>NA<br>NA<br>NA<br>NA<br>NA<br>NA<br>NA<br>NA<br>NA<br>NA<br>NA<br>NA | NA<br>NA<br>NA<br>NA<br>NA<br>NA<br>NA<br>NA<br>NA<br>NA<br>NA<br>NA<br>NA | NA<br>NA<br>NA<br>NA<br>NA<br>NA<br>NA<br>NA<br>NA<br>NA<br>NA<br>NA<br>NA |
| <b>Total</b>      | <b>25</b>     | <b>21</b>    | <b>1215</b>                |                |                                                                                                                                                  |                                                                                                                                                                      |                                                                                                                                                  |                                                                            |                                                                            |                                                                            |

\* Manually curated (see Material and methods); \*\*ROS1 multiple hits

Abbreviation: CDS, coding sequence; AA, amino acid; VAF, variant allele frequency (derived from the original publication and cBioportal); TC, thyroid cancer; FTC, follicular TC; PTC, papillary TC; FTA, follicular thyroid adenoma; ATC, anaplastic TC; NA, not available; PMID, PubMed ID
